# Supplementary material for: The composition and stability of the vaginal microbiota of normal pregnant women is different from that of non-pregnant women
Source: PubMed Central journal article supplement (PMC3916806; doi:10.1186/2049-2618-2-4), 2014-02-03

Figure S1

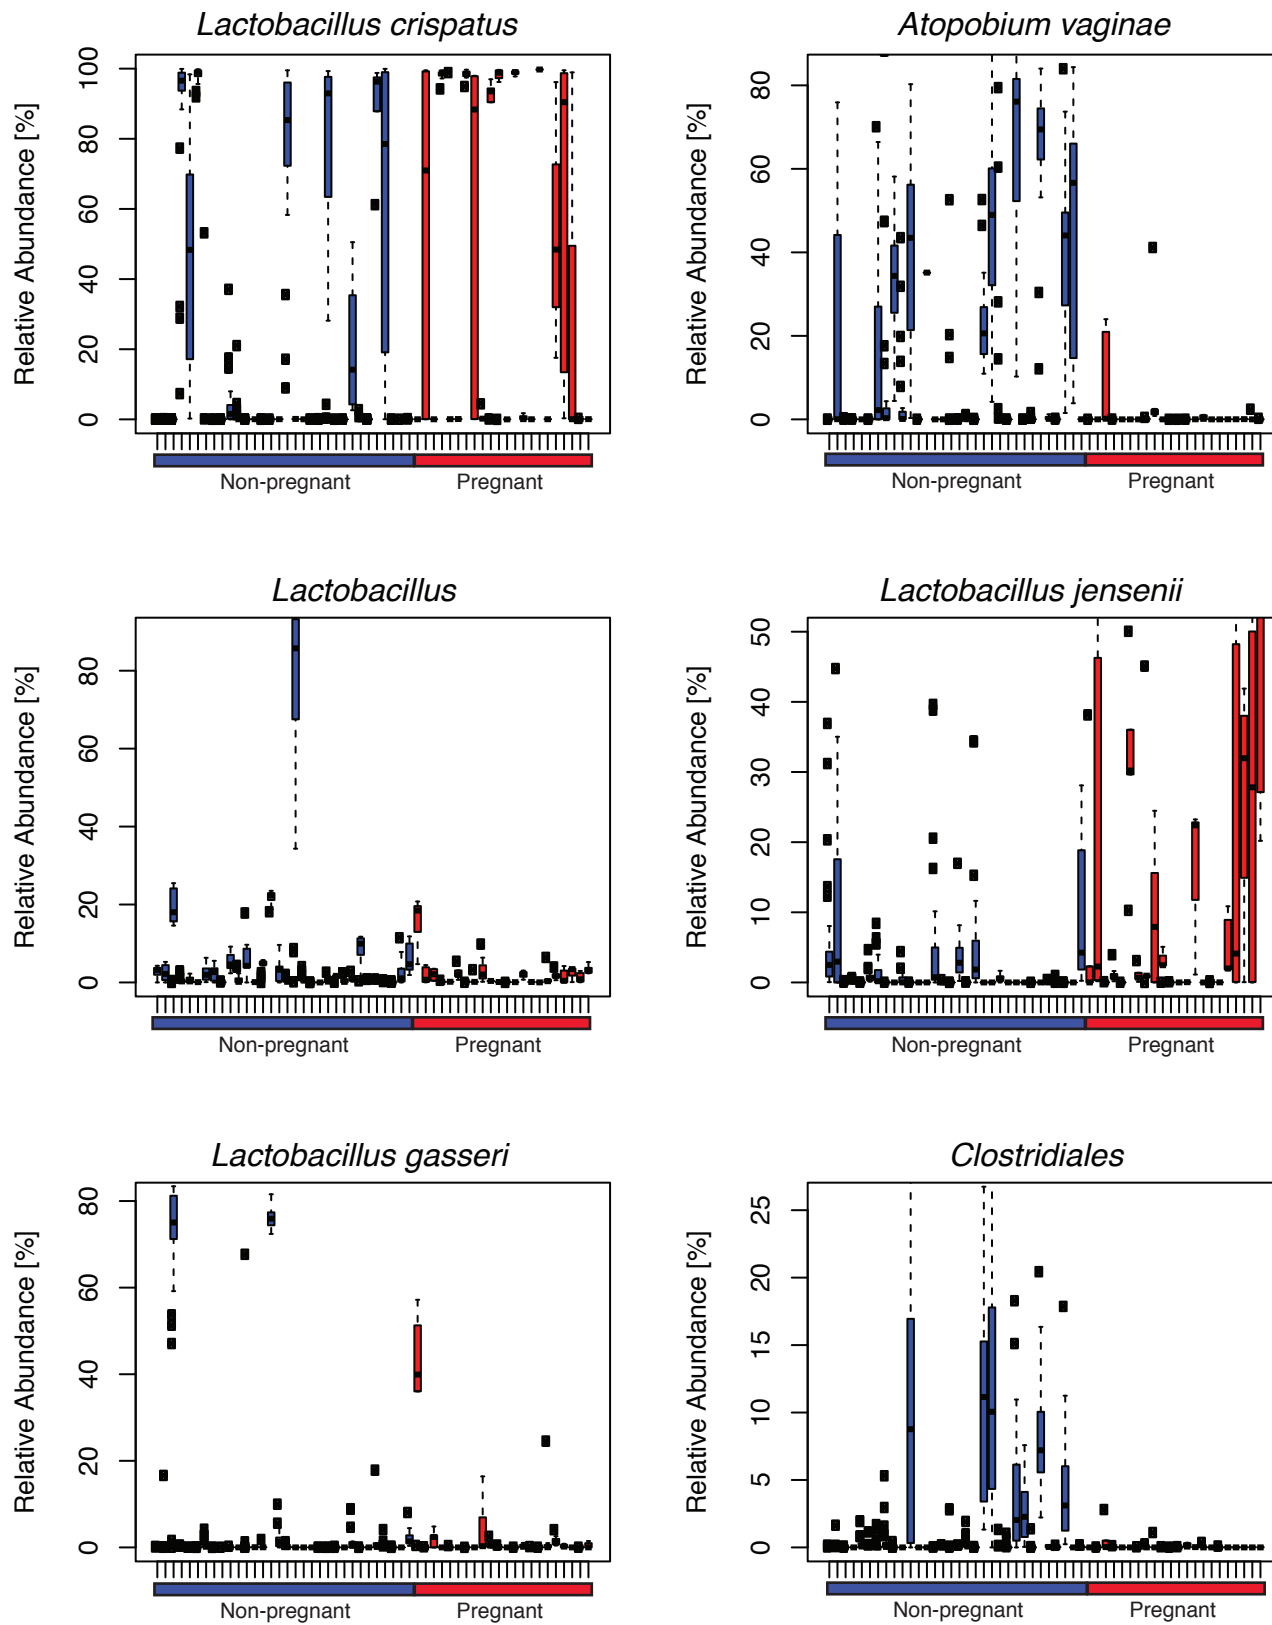

*Parvimonas micra*

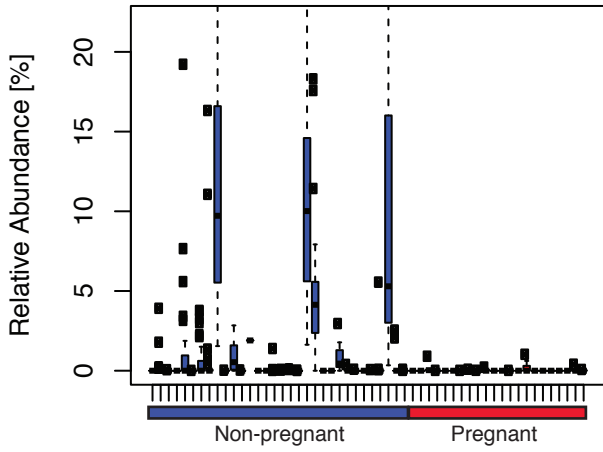

*Leptotrichia amnionii*

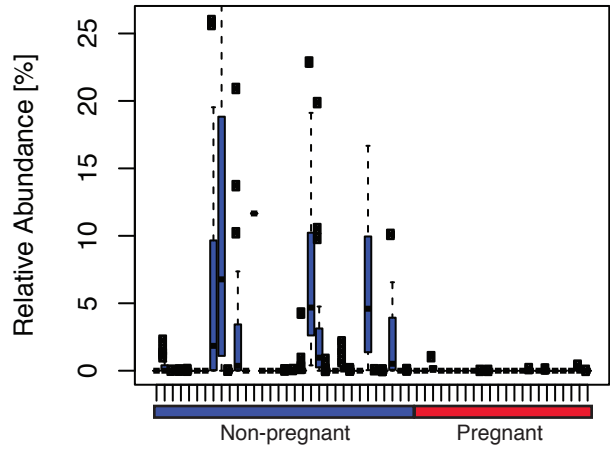

*Prevotella genogroup 2*

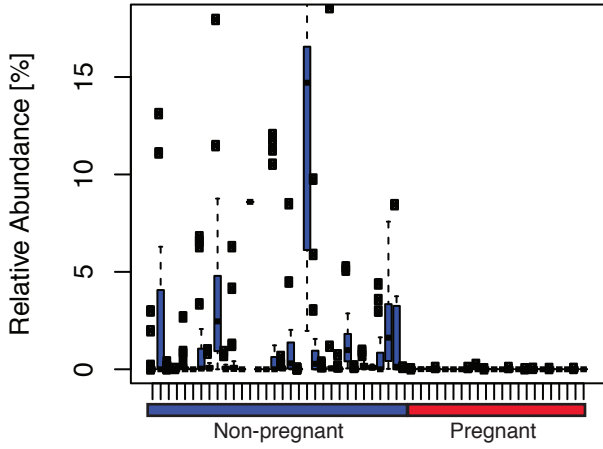

*Actinomycetales*

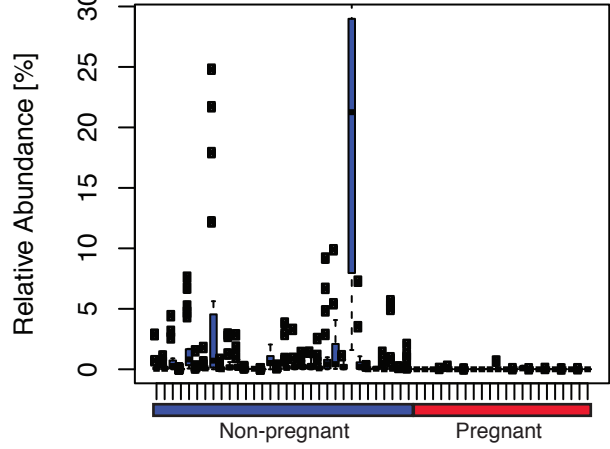

*Gardnerella vaginalis*

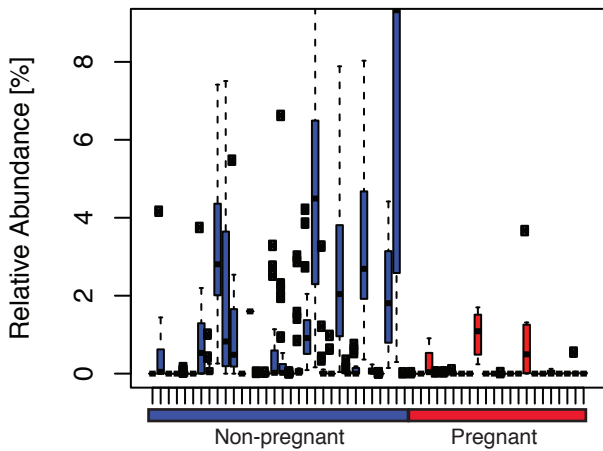

*Streptococcus anginosus*

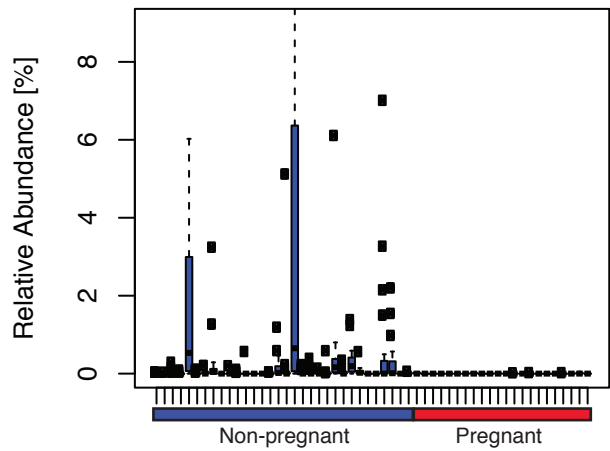

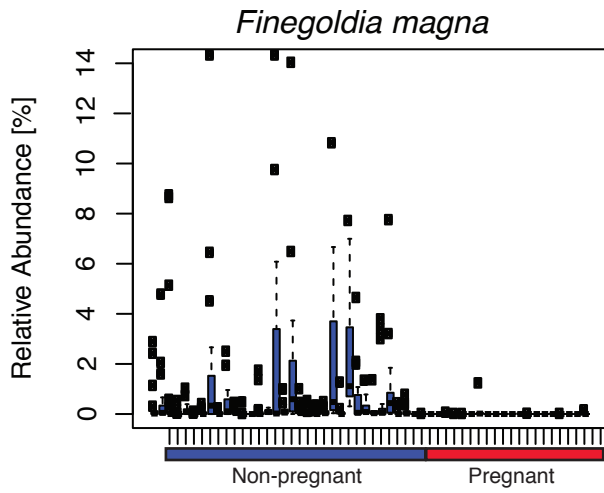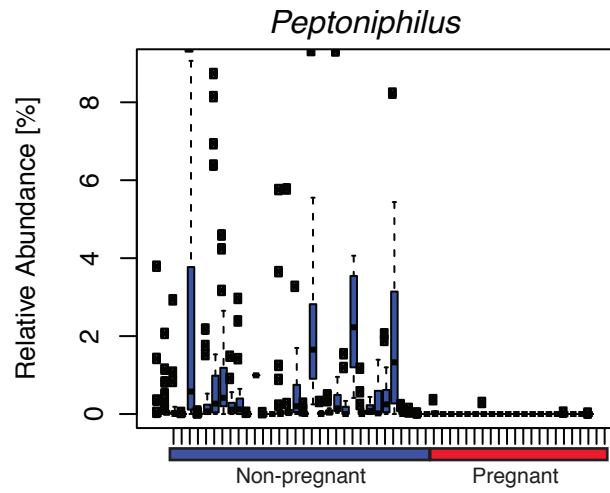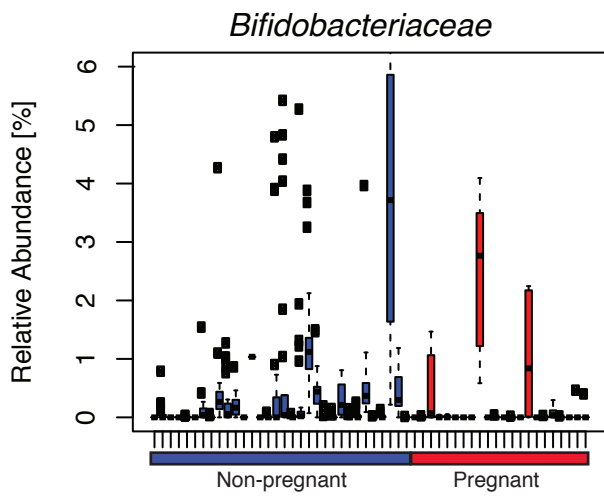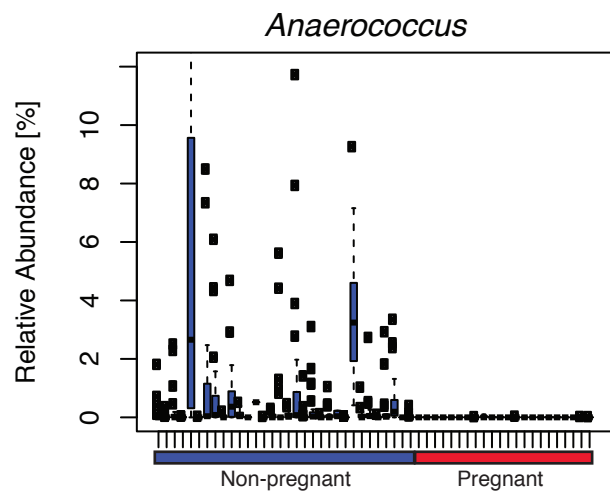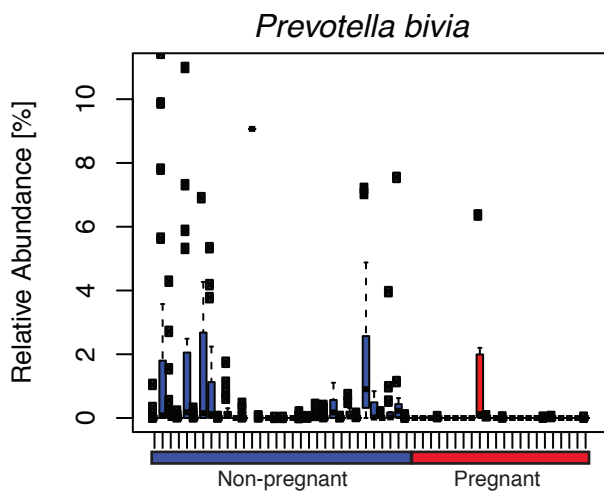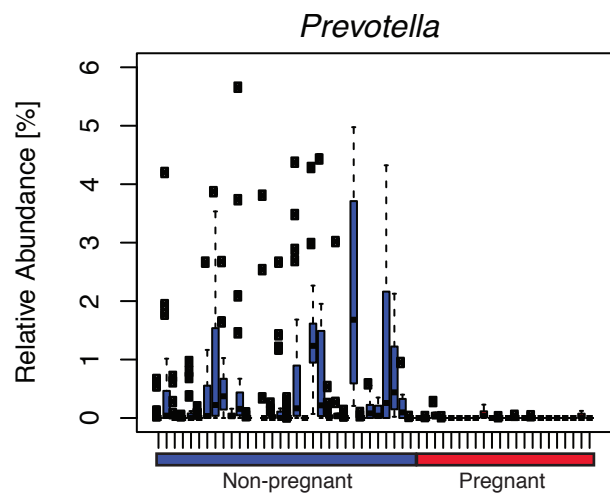

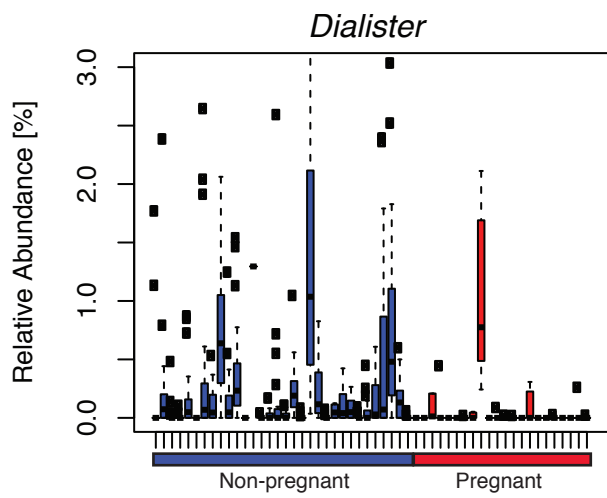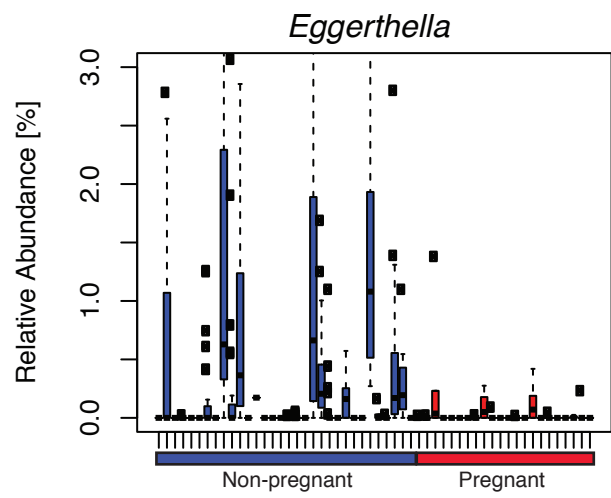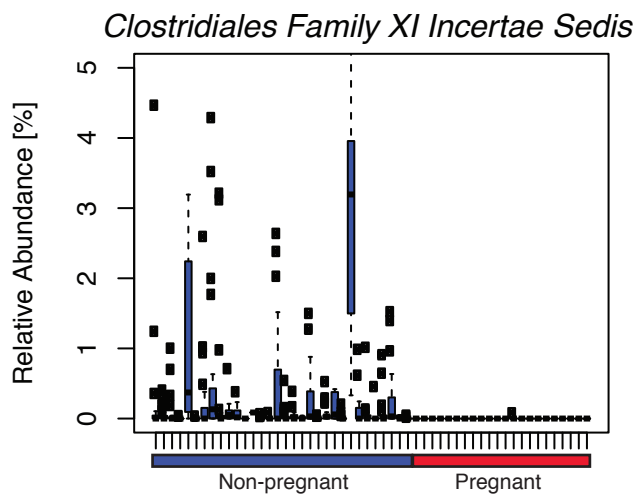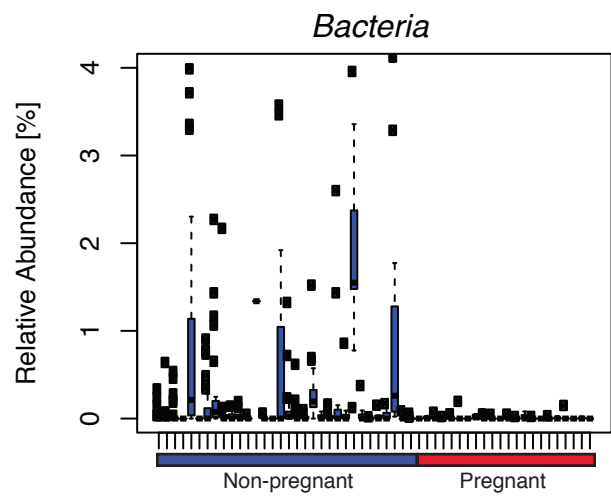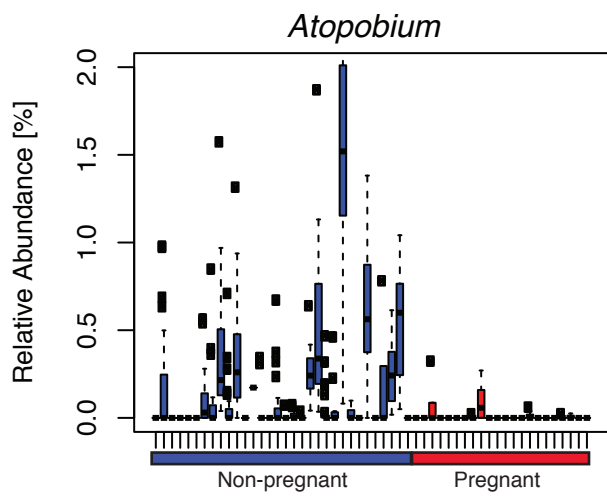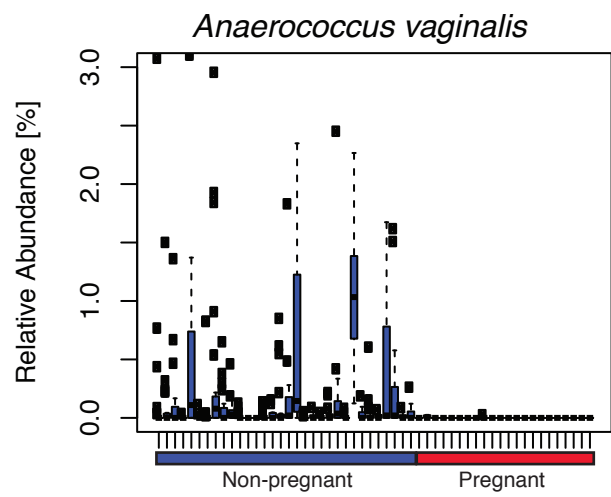

*Ureaplasma*

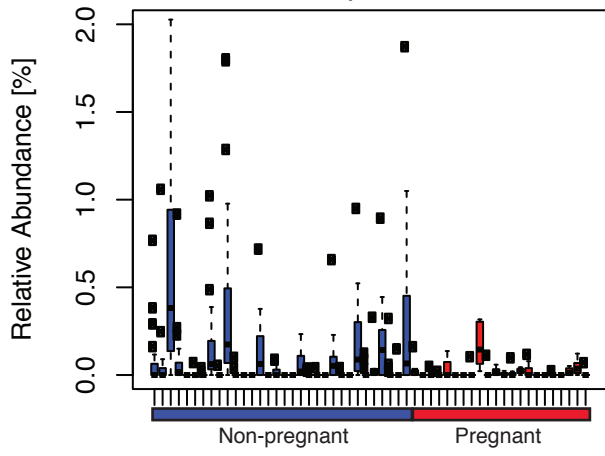

*Lactobacillus vaginalis*

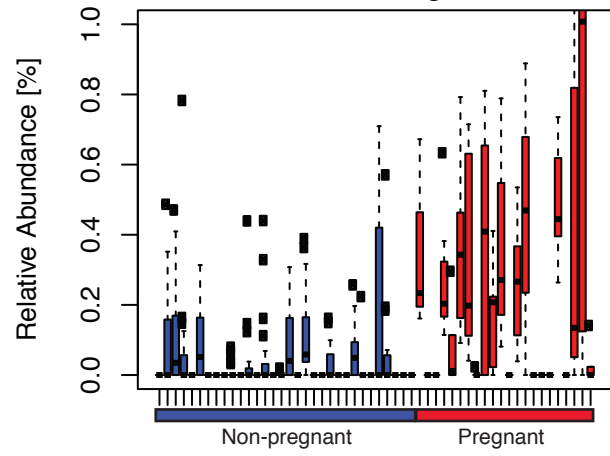

Supplement: 2049-2618-2-4-S2.pdf [file 2049-2618-2-4-S2.pdf]
